# Supplementary material for: Clinical significance of massive proteinuria in primary IgA nephropathy with and without nephrotic syndrome: a single center cohort study
Source: PubMed Central journal article supplement (PMC10586089; doi:10.1080/0886022x.2023.2267138), 2023-10-18
Supplement: IRNF_A_2267138_SM1199.pdf [file IRNF_A_2267138_SM1199.pdf]

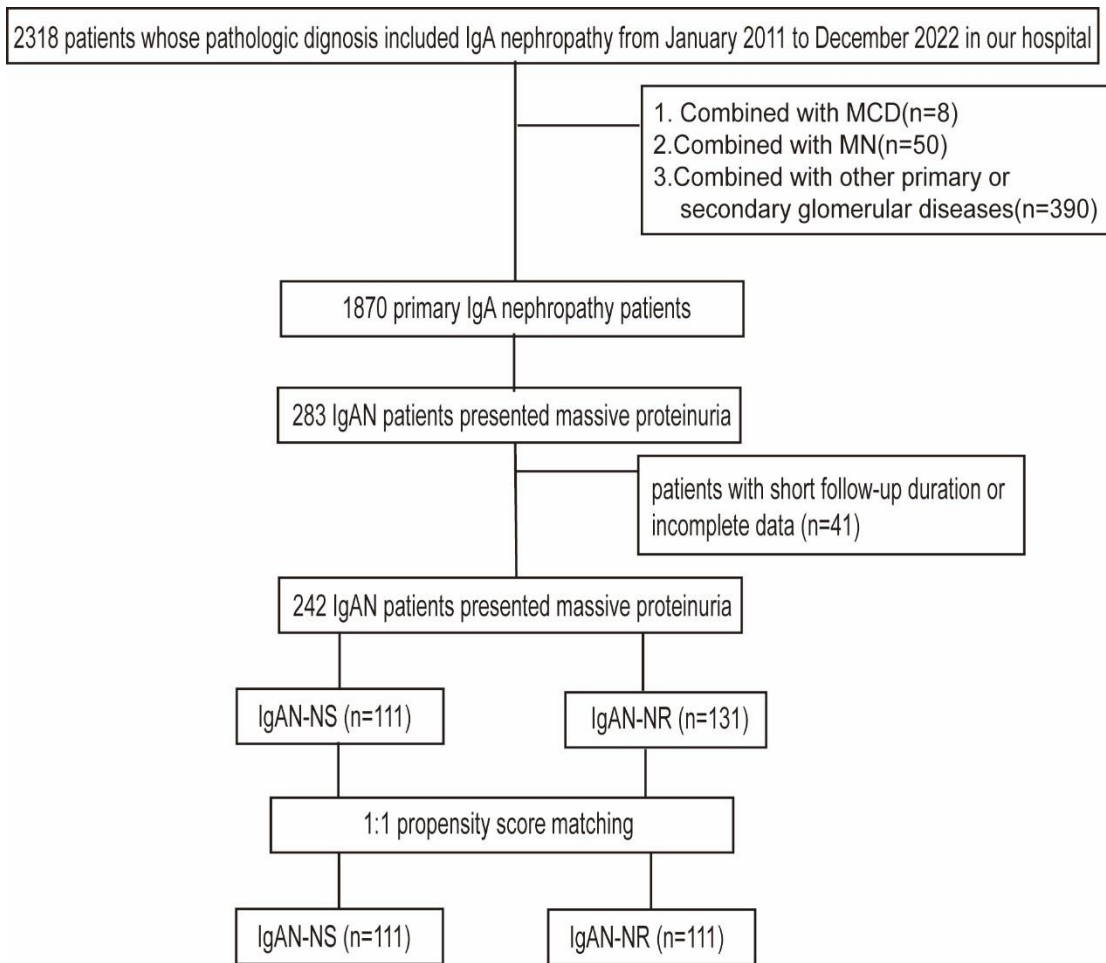

Supplemental Figure 1 The flow chart

IgAN-NS, the IgAN with NS; IgAN-NR, the IgAN with nephrotic-range proteinuria; MCD, minimal change disease; MN, Membranous nephropathy.

Table S1 The percentage of missing data of 222 cases in this study

| Factors                                    | The percentage of missing data |
|--------------------------------------------|--------------------------------|
| Age,y                                      | 0%                             |
| Male                                       | 0%                             |
| Follow-up duration,m                       | 0%                             |
| eGFR                                       | 0%                             |
| Body mass index                            | 2.0%                           |
| Systolic blood pressure, mmHg              | 6.0%                           |
| Diastolic blood pressure, mmHg             | 6.0%                           |
| Mean arterial pressure, mmHg               | 6.0%                           |
| Hemoglobin, g/L                            | 2.7%                           |
| Serum creatinine, mg/dL                    | 0%                             |
| Serum albumin, g/L                         | 0%                             |
| Total cholesterol, mmol/L                  | 1.4%                           |
| Triglyceride, mmol/L                       | 1.4%                           |
| HDL-cholesterol, mmol/L                    | 1.4%                           |
| LDL-cholesterol, mmol/L                    | 1.4%                           |
| Uric acid,mmol/L                           | 8.1%                           |
| Fibrinogen, g/L                            | 2.3%                           |
| C-reactive protein, g/L                    | 9.9%                           |
| Serum IgA, g/L                             | 1.4%                           |
| Proteinuria, g/24h                         | 0%                             |
| Urine red blood cell count, RBC/ $\mu$ L   | 0%                             |
| Urine white blood cell count, WBC/ $\mu$ L | 0%                             |
| <b>Therapy</b>                             |                                |
| Renin-angiotensinsystem inhibito           | 0%                             |
| Steroid                                    | 0%                             |
| Immunosuppressant                          | 0%                             |
